# Supplementary material for: Analysis and visualization of quantitative proteomics data using FragPipe-Analyst
Source: PubMed Central journal article supplement — bioRxiv. 2024 Mar 10:2024.03.05.583643. Preprint. [Version 1] doi: 10.1101/2024.03.05.583643 (PMC10942459; doi:10.1101/2024.03.05.583643), 2024-03-10
Supplement: media-1.pdf [file media-1.pdf]

Supporting information for

# Analysis and visualization of quantitative proteomics data using FragPipe-Analyst

*Yi Hsiao<sup>1</sup>, Haijian Zhang<sup>2</sup>, Ginny Xiaohe Li<sup>3</sup>, Yamei Deng<sup>3</sup>, Fengchao Yu<sup>3</sup>, Hossein Valipour Kahrood<sup>2,4</sup>, Joel R. Steele<sup>2</sup>, Ralf B. Schittenhelm<sup>2,4</sup>, and Alexey I. Nesvizhskii<sup>1,3,\*</sup>*

<sup>1</sup>Department of Computational Medicine and Bioinformatics, University of Michigan, Ann Arbor, MI 48109, USA,

<sup>2</sup>Monash Proteomics & Metabolomics Platform, Department of Biochemistry and Molecular Biology, Biomedicine Discovery Institute, Monash University, Clayton, Victoria 3800, Australia,

<sup>3</sup>Department of Pathology, University of Michigan, Ann Arbor, MI 48109, USA,

<sup>4</sup>Monash Bioinformatics Platform, Department of Biochemistry and Molecular Biology, Biomedicine Discovery Institute, Monash University, Clayton, Victoria 3800, Australia.

**Supplementary figure S1.** PCA plot by batch of ccRCC proteomics dataset collected by TMT.

**Supplementary figure S2.** Missing value heatmap of ccRCC proteomics dataset collected by TMT.

**Supplementary figure S3.** Over representation test result for downregulation part in tumors vs NAT comparison of ccRCC proteomics dataset collected by TMT.

**Supplementary figure S4.** PCA plot of ccRCC proteomics dataset collected by data-independent acquisition (DIA).

**Supplementary figure S5.** Correlation heatmap of ccRCC proteomics dataset collected by DIA.

**Supplementary figure S6.** Volcano plot (left) and overrepresentation test result (right) of ccRCC proteomics dataset collected by DIA.

**Supplementary figure S7.** Scatter plot shows comparison of log<sub>2</sub> fold changes obtained from DIA and TMT experiments when comparing tumors versus NATs.

**Supplementary figure S8.** Density plot shows the imputation effect on AP-MS experiments used here.

**Supplementary figure S9.** Network visualization of HNSCC AP-MS dataset generated by SAINTexpress.

**Supplementary figure S10.** PCA plot of peptide-level analysis on ccRCC proteomics dataset.

**Supplementary figure S11.** Correlation matrix plot of ccRCC proteomics dataset using peptide-level quantification result.

**Supplementary figure S12.** Volcano plot (left) and overrepresentation test result (right) of peptide-level analysis on ccRCC proteomics dataset.

**Supplementary figure S13.** PCA plot of ccRCC phosphoproteomics dataset after normalization.

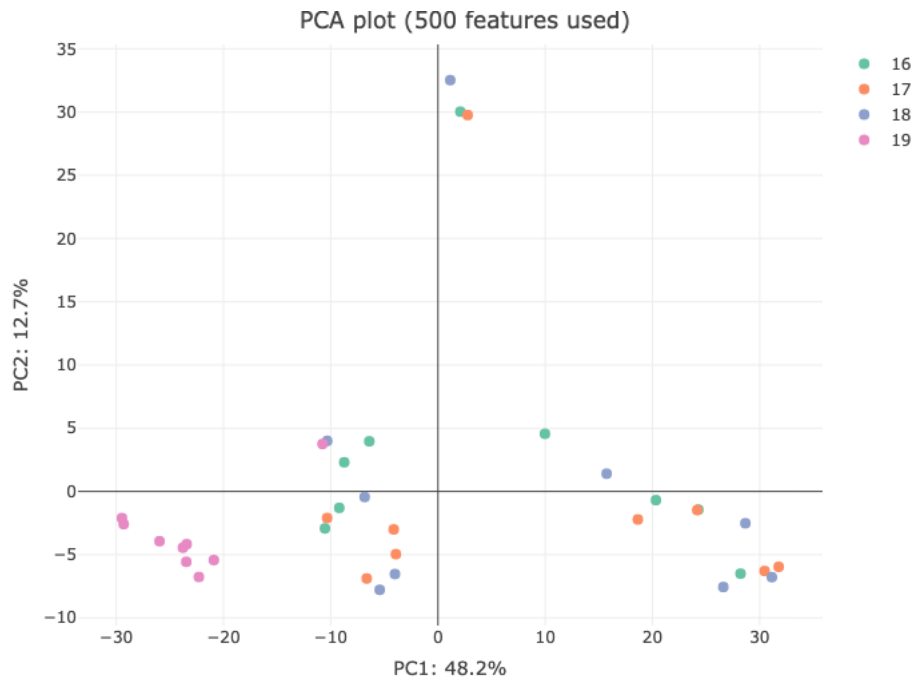

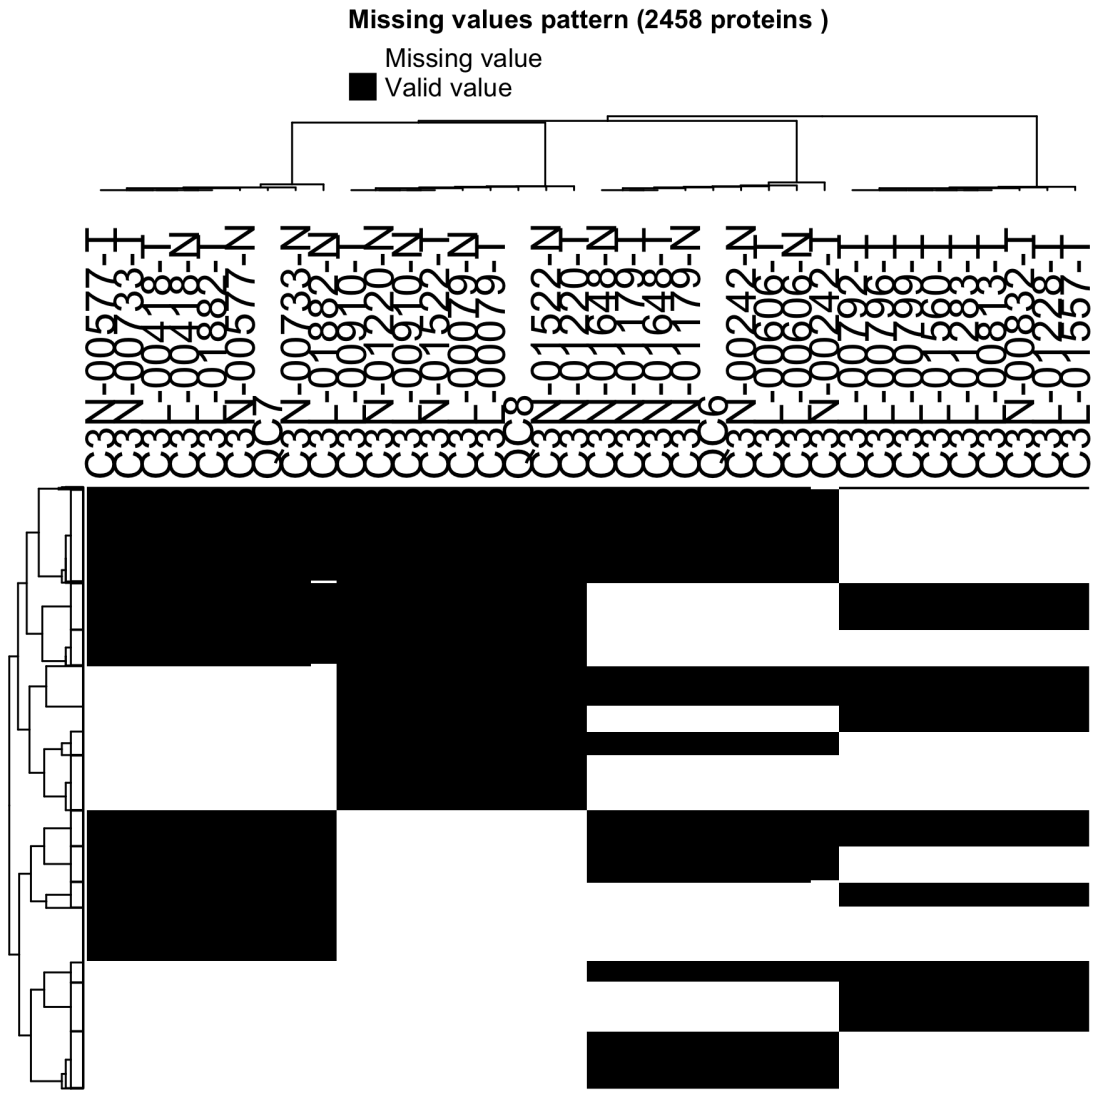

**Supplementary figure S2.** Missing value heatmap of ccRCC proteomics dataset collected by TMT.

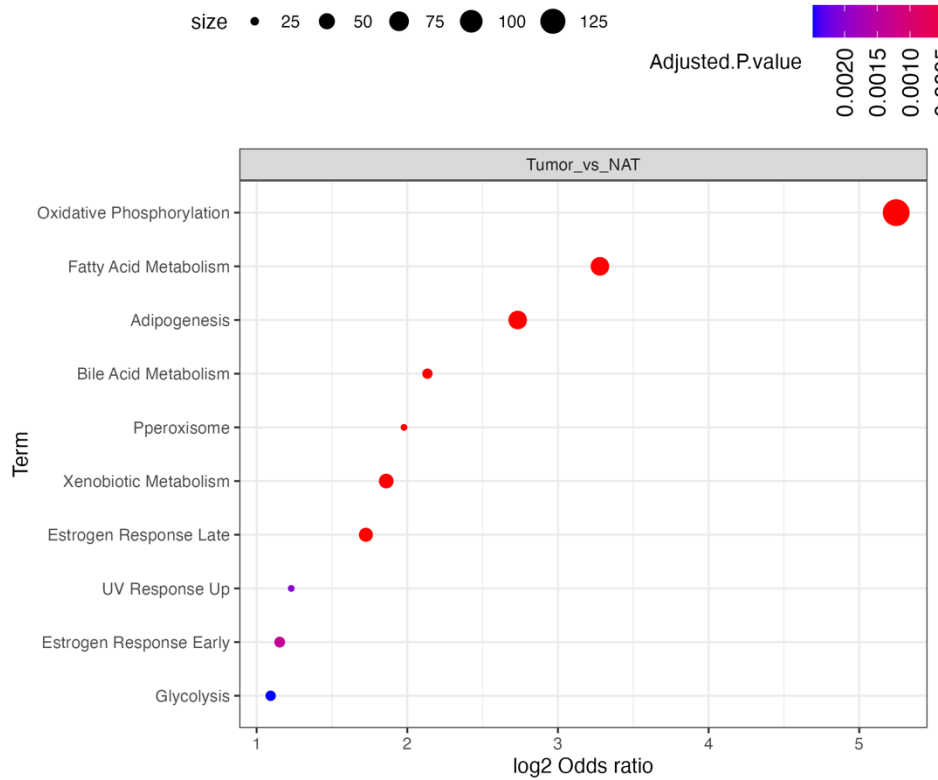

**Supplementary figure S3.** Over representation test result for downregulation part in tumors vs NAT comparison of ccRCC proteomics dataset collected by TMT.

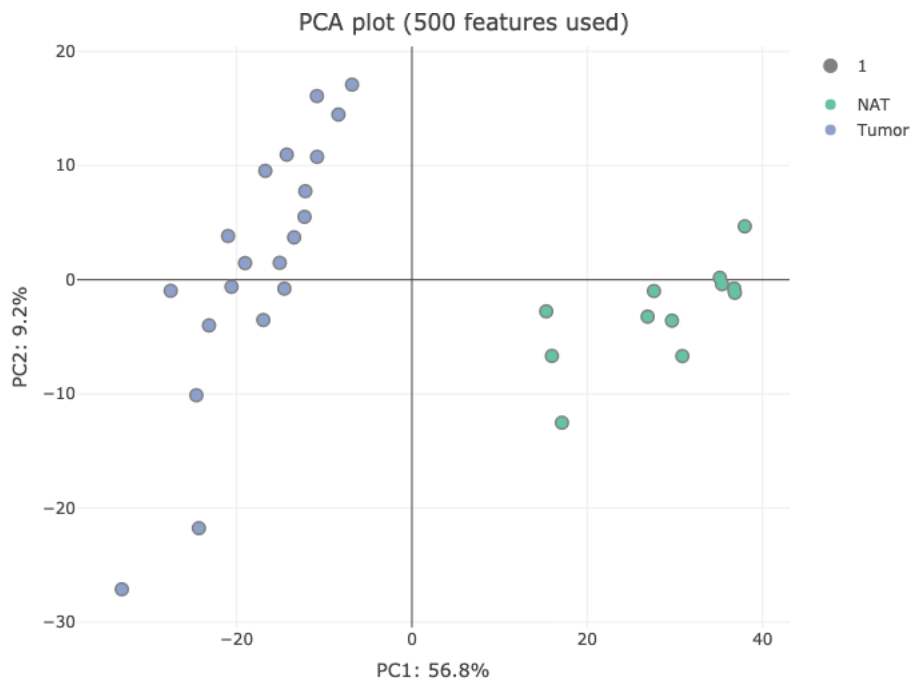

**Supplementary figure S4.** PCA plot of ccRCC proteomics dataset collected by data-independent acquisition (DIA).

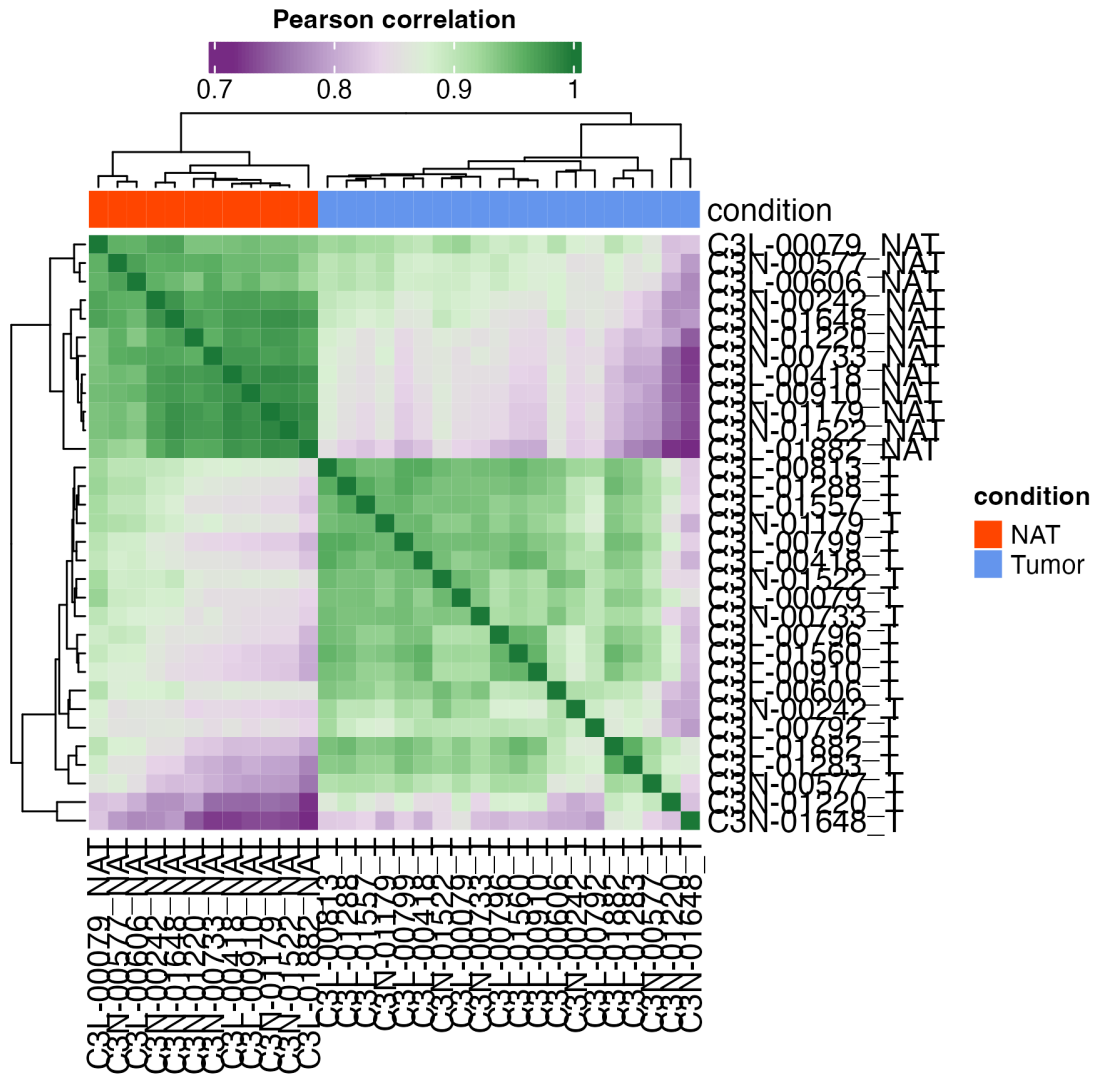

**Supplementary figure S5.** Correlation heatmap of ccRCC proteomics dataset collected by DIA.

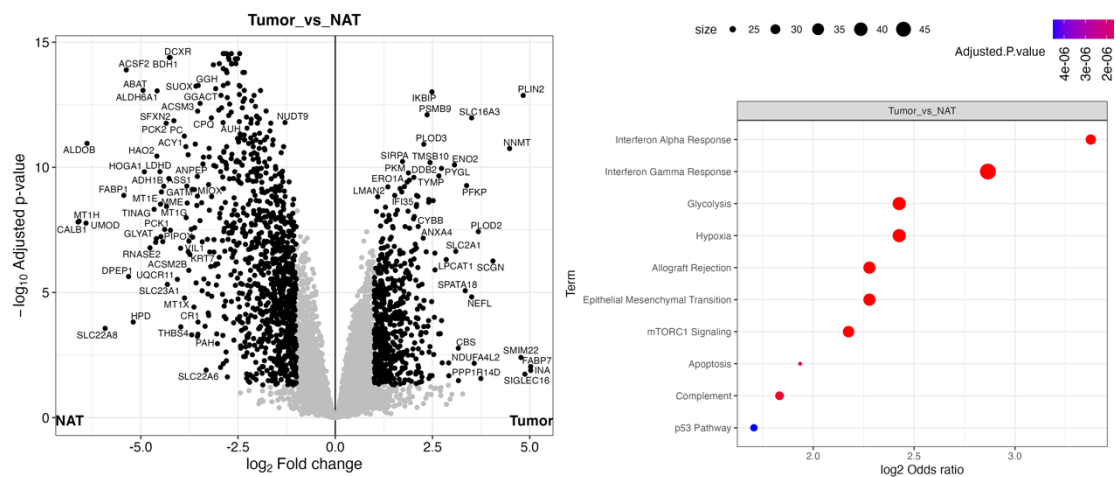

**Supplementary figure S6.** Volcano plot (left) and overrepresentation test result (right) of ccRCC proteomics dataset collected by DIA.

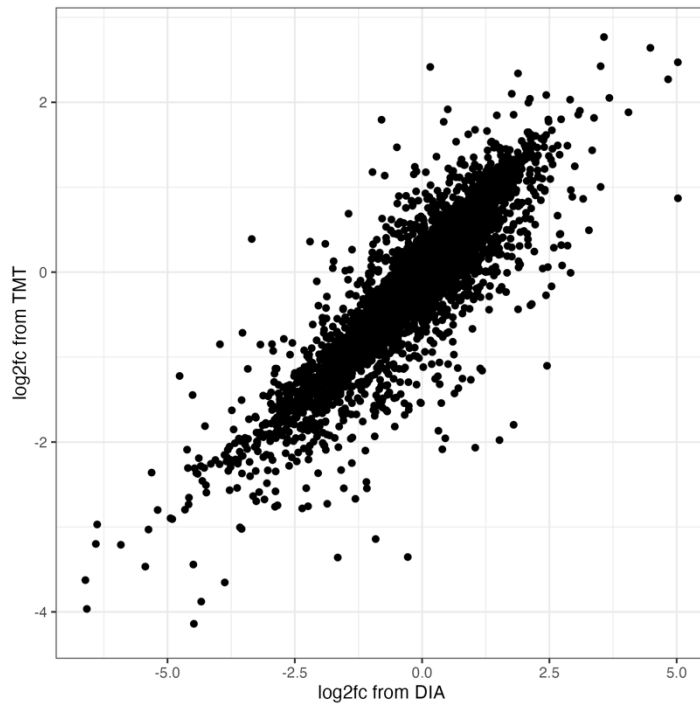

**Supplementary figure S7.** Scatter plot shows comparison of log<sub>2</sub> fold changes obtained from DIA and TMT experiments when comparing tumors versus NATs.

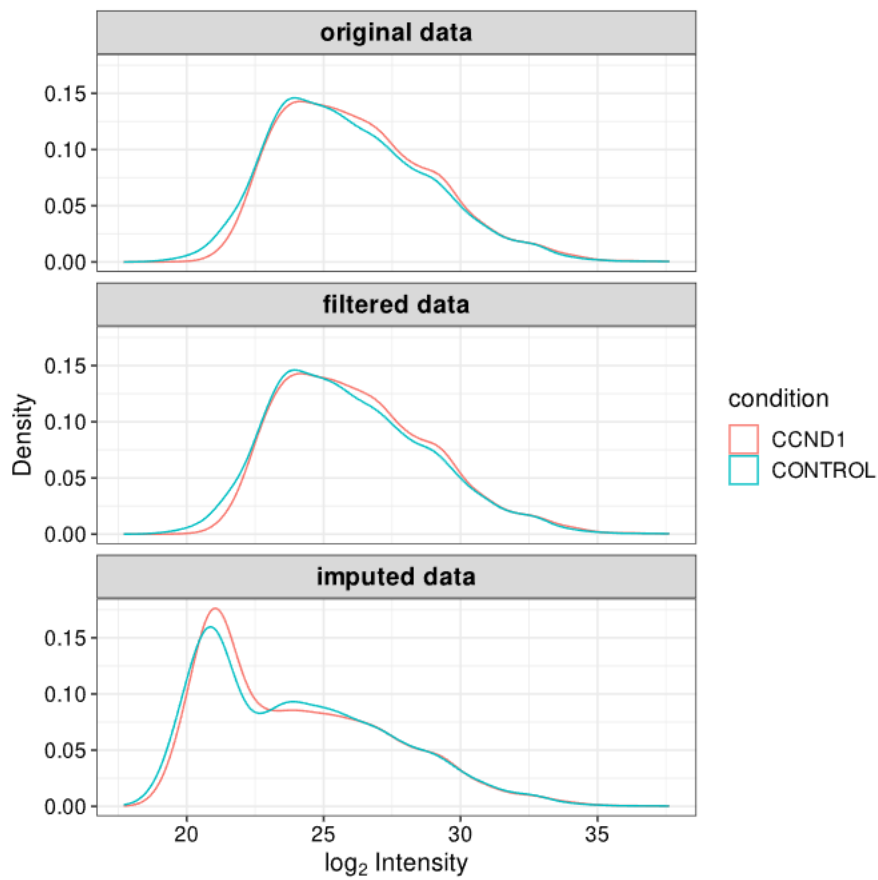

**Supplementary figure S8.** Density plot shows the imputation effect (Perseus style imputation) on AP-MS experiments.

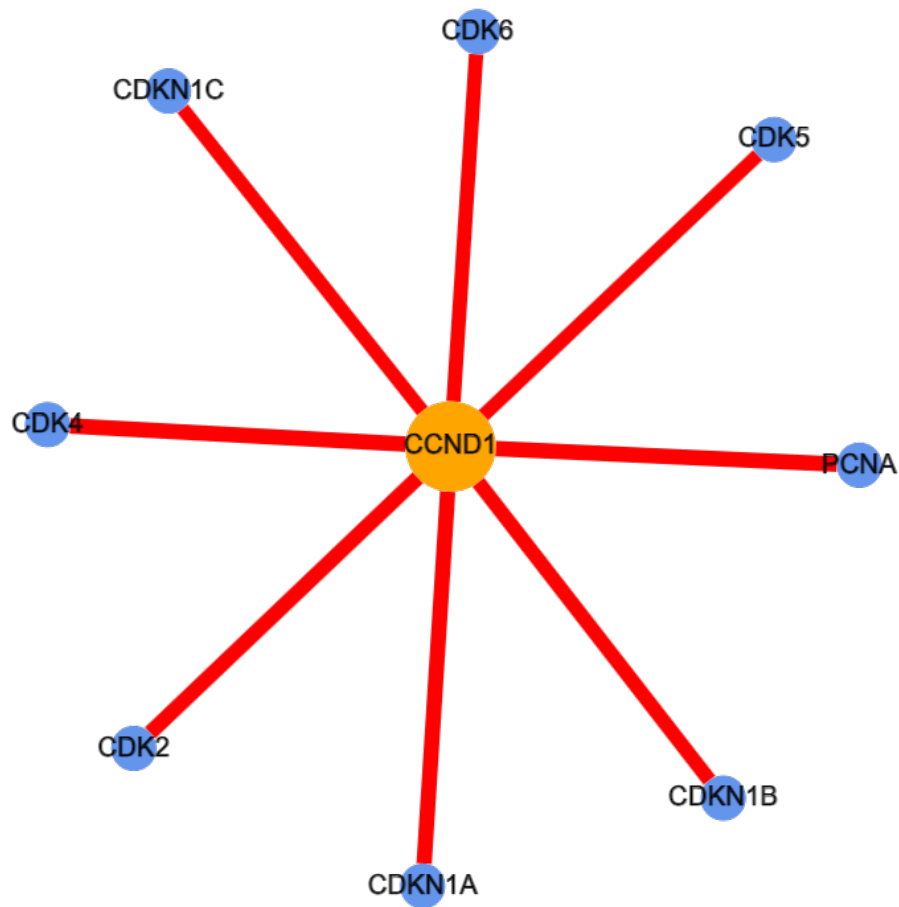

**Supplementary figure S9.** Network visualization of HNSCC AP-MS dataset generated by SAINTexpress.

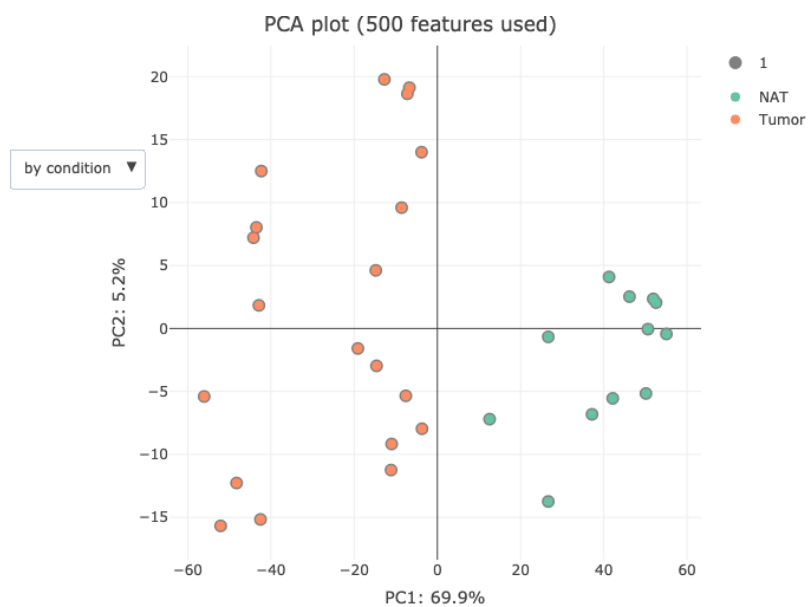

**Supplementary figure S10.** PCA plot of peptide-level analysis of ccRCC proteomics dataset.





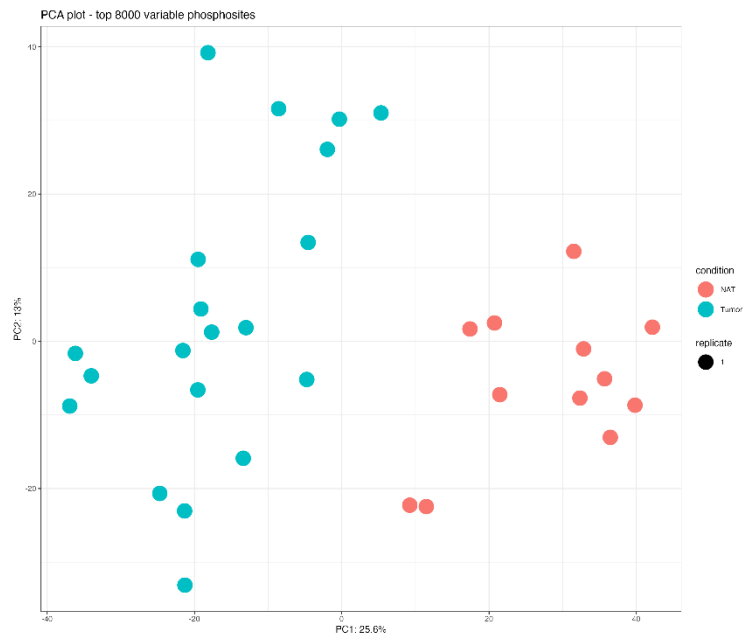

**Supplementary figure S13.** PCA plot of ccRCC phosphoproteomics dataset after normalization.
